# Supplementary material for: Panoramic Semiquantitave Analysis for Multielement Characterization of Liquid and Solid Waste Samples
Source: MDPI journal article supplement (doi:10.3390/pr11123379), 2023-12-06
Supplement: s1 [file s1]

|           |       |       |       |       |       |       |       |
|-----------|-------|-------|-------|-------|-------|-------|-------|
| <b>La</b> | 0.978 | 0.583 | 0.877 | 0.625 | 0.098 | 1.000 | 0.151 |
| <b>Ce</b> | 0.346 | 0.321 | 0.180 | 0.488 | 0.754 | 0.425 | 0.017 |
| <b>Pr</b> | 0.486 | 0.805 | 0.577 | 0.815 | 0.114 | 0.391 | 0.650 |
| <b>Nd</b> | 0.154 | 0.965 | 0.158 | 0.659 | 0.688 | 0.283 | 0.137 |
| <b>Sm</b> | 0.987 | 0.602 | 0.687 | 0.857 | 0.274 | 0.700 | 0.345 |
| <b>Eu</b> | 0.056 | 0.574 | 0.729 | 0.488 | 0.242 | 0.880 | 0.574 |
| <b>Gd</b> | 0.081 | 0.576 | 0.399 | 0.888 | 0.595 | 0.775 | 0.212 |
| <b>Tb</b> | 0.898 | 0.772 | 0.766 | 0.706 | 0.334 | 0.107 | 0.862 |
| <b>Dy</b> | 0.454 | 0.070 | 0.165 | 0.381 | 0.241 | 0.581 | 0.409 |
| <b>Ho</b> | 0.793 | 0.571 | 0.545 | 0.315 | 0.955 | 0.406 | 0.345 |
| <b>Er</b> | 0.776 | 0.678 | 0.244 | 0.489 | 0.142 | 0.607 | 0.705 |
| <b>Tm</b> | 0.385 | 0.513 | 0.957 | 0.870 | 0.674 | 0.736 | 0.939 |
| <b>Yb</b> | 0.723 | 0.822 | 0.271 | 0.118 | 0.277 | 0.480 | 0.037 |
| <b>Lu</b> | 0.648 | 0.706 | 0.863 | 0.336 | 0.938 | 0.345 | 0.004 |
| <b>Hf</b> | 0.191 | 0.157 | 0.672 | 0.606 | 0.768 | 0.821 | 0.236 |
| <b>Ta</b> | 0.090 | 0.711 | 0.212 | 0.668 | 0.601 | 0.867 | 0.878 |
| <b>W</b>  | 0.129 | 0.862 | 0.159 | 0.565 | 0.617 | 0.822 | 0.286 |
| <b>Re</b> | 0.242 | 0.818 | 0.562 | 0.706 | 0.934 | 0.086 | 0.143 |
| <b>Os</b> | 0.422 | 0.347 | 0.237 | 0.495 | 0.595 | 0.898 | 0.012 |
| <b>Ir</b> | 0.699 | 0.419 | 0.106 | 0.508 | 0.005 | 0.639 | 0.110 |
| <b>Pt</b> | 0.642 | 0.372 | 0.824 | 0.623 | 0.636 | 0.755 | 0.886 |
| <b>Au</b> | 0.589 | 0.246 | 0.845 | 0.175 | 0.906 | 0.556 | 0.582 |
| <b>Hg</b> | 0.831 | 0.941 | 0.616 | 0.204 | 0.388 | 0.417 | 0.505 |
| <b>Tl</b> | 0.777 | 0.913 | 0.909 | 0.536 | 0.406 | 0.846 | 0.691 |
| <b>Pb</b> | 0.750 | 0.067 | 0.739 | 0.147 | 0.049 | 0.840 | 0.483 |
| <b>Bi</b> | 0.277 | 0.319 | 0.739 | 0.296 | 0.054 | 0.118 | 0.124 |
| <b>Th</b> | 0.616 | 0.160 | 0.854 | 0.990 | 0.375 | 0.139 | 0.873 |
| <b>U</b>  | 0.092 | 0.883 | 0.101 | 0.104 | 0.456 | 0.468 | 0.559 |

\* - P-value < 0.05

The elements not used for calibration are expressed in red lettering.

Table S2. P-values obtained by application of t-test for the certified elements in RM LGC 6177.

| Elem.     | Step 1 | Step 2 | Step 3 | Step 4 | Step 5 | Step 6 | Step 7 |
|-----------|--------|--------|--------|--------|--------|--------|--------|
| <b>B</b>  | 0.136  | 0.529  | *      | *      | *      | *      | *      |
| <b>Na</b> | 0.247  | *      | *      | 0.074  | *      | *      | *      |
| <b>Mg</b> | 0.052  | *      | 0.090  | 0.055  | *      | 0.631  | 0.290  |
| <b>Si</b> | 0.215  | 0.073  | 0.162  | 0.308  | 0.090  | 0.333  | 0.063  |
| <b>P</b>  | 0.050  | 0.058  | 0.071  | *      | 0.059  | 0.195  | 0.076  |
| <b>K</b>  | *      | 0.184  | 0.613  | *      | *      | *      | *      |
| <b>Ca</b> | *      | *      | 0.075  | *      | *      | *      | *      |
| <b>Fe</b> | 0.057  | 0.742  | 0.074  | 0.537  | 0.057  | 0.094  | 0.057  |
| <b>Cr</b> | 0.192  | *      | 0.183  | 0.529  | 0.478  | 0.808  | 0.478  |
| <b>Mn</b> | 0.742  | 0.901  | 0.827  | 0.712  | 0.578  | 0.383  | *      |
| <b>Ni</b> | 0.225  | *      | 0.159  | *      | 0.053  | *      | 0.097  |

\* - P-value < 0.05

The elements not used for calibration are expressed in red lettering.

Table S3. P-values from applied t-test for the determination of the statistical significance of the data for ERM-CC144 obtained after calibration with water standard solution (WSS) and CRM 029.

| Elem.     | Calibration with WSS |        |        |        |        |        | Calibration with CRM 029 |        |        |        |        |
|-----------|----------------------|--------|--------|--------|--------|--------|--------------------------|--------|--------|--------|--------|
|           | Step 1               | Step 2 | Step 3 | Step 4 | Step 5 | Step 6 | Step 1                   | Step 2 | Step 3 | Step 4 | Step 5 |
| <b>As</b> | *                    | □      | □      | □      | □      | □      | 0.102                    | □      | □      | □      | □      |
| <b>Cd</b> | 0.306                | □      | □      | □      | □      | □      | 0.109                    | 0.432  | □      | □      | □      |
| <b>Co</b> | 0.369                | 0.580  | 0.456  | *      | □      | □      | 0.085                    | □      | □      | □      | □      |
| <b>Cr</b> | *                    | □      | □      | □      | □      | □      | 0.306                    | 0.125  | □      | □      | □      |
| <b>Cu</b> | 0.323                | □      | □      | □      | □      | □      | *                        | □      | □      | □      | □      |
| <b>Fe</b> | 0.194                | *      | 0.110  | *      | *      | □      | *                        | *      | *      | □      | □      |
| <b>Hg</b> | 0.144                | 0.189  | 0.177  | *      | □      | □      | 0.334                    | □      | □      | □      | □      |
| <b>Mn</b> | *                    | *      | *      | *      | □      | □      | *                        | □      | □      | □      | □      |
| <b>Ni</b> | *                    | *      | *      | □      | □      | □      | *                        | *      | □      | □      | □      |
| <b>Pb</b> | 0.121                | 0.160  | □      | □      | □      | □      | 0.301                    | 0.209  | 0.059  | 0.278  | 0.594  |
| <b>Zn</b> | 0.166                | 0.182  | □      | □      | □      | □      | 0.223                    | 0.199  | 0.263  | 0.418  | -      |
| <b>Al</b> | *                    | 0.119  | *      | *      | *      | *      | 0.058                    | 0.062  | 0.148  | □      | □      |
| <b>Ca</b> | 0.105                | 0.443  | 0.072  | 0.566  | □      | □      | 0.268                    | □      | □      | □      | □      |
| <b>K</b>  | *                    | *      | *      | *      | 0.119  | *      | 0.058                    | 0.184  | □      | □      | □      |
| <b>Mg</b> | *                    | *      | 0.070  | 0.157  | □      | □      | 0.088                    | □      | □      | □      | □      |
| <b>Na</b> | 0.486                | 0.335  | *      | *      | *      | □      | 0.132                    | □      | □      | □      | □      |
| <b>P</b>  | *                    | *      | *      | *      | □      | □      | 0.094                    | 0.085  | □      | □      | □      |
| <b>Ti</b> | *                    | *      | *      | □      | □      | □      | 0.140                    | 0.273  | 0.879  | 0.277  | □      |

\* - P-value < 0.05

□ – the element does not present in the calibration
